# Supplementary material
Source: PubMed Central journal article supplement (PMC1690510)
Supplement: 10687822s01.pdf [file 10687822s01.pdf]

This is an appendix to the paper by Møller *et al.* 2000 The evolution of song repertoires and immune defence in birds. *Proc. R. Soc. Lond. B* **267**, 165–169.

Electronic appendices are refereed with the paper. However, no attempt has been made to impose a uniform editorial style on the electronic appendix.

## Appendix A

Information on sexual dichromatism (0 monochromatism, 1 dichromatism), migratory habits (0 resident, 1 migratory), hole nesting (0 open nesting, 1 hole nesting), colonial nesting (0 solitary nesting, 1 colonial nesting), repertoire size, spleen mass and body mass in birds.

| species                               | sexual<br>dichrom-<br>atism | migration<br>hole<br>nesting | colonial<br>nesting | repertoire<br>size | spleen<br>mass (s.e.)(g) | body<br>mass (s.e.)(g) | <i>N</i>  |    |
|---------------------------------------|-----------------------------|------------------------------|---------------------|--------------------|--------------------------|------------------------|-----------|----|
| <i>Acrocephalus palustris</i>         | 0                           | 1                            | 0                   | 0                  | 90                       | 0.035                  | 10.5      | 1  |
| <i>Acrocephalus<br/>schoenobaenus</i> | 0                           | 1                            | 0                   | 0                  | 55                       | 0.030                  | 10.8      | 1  |
| <i>Acrocephalus scirpaceus</i>        | 0                           | 1                            | 0                   | 0                  | 80                       | 0.025(0.004)           | 10.8(0.4) | 6  |
| <i>Calcarius lapponicus</i>           | 1                           | 1                            | 0                   | 0                  | 1                        | 0.020                  | 23.8      | 1  |
| <i>Carduelis chloris</i>              | 1                           | 0                            | 0                   | 0                  | 32.5                     | 0.048(0.006)           | 26.7(0.8) | 16 |
| <i>Carduelis flammea</i>              | 1                           | 1                            | 0                   | 0                  | 16                       | 0.030                  | 18.2      | 1  |
| <i>Certhia brachydactyla</i>          | 0                           | 0                            | 1                   | 0                  | 1.5                      | 0.020                  | 8.3       | 1  |
| <i>Certhia familiaris</i>             | 0                           | 0                            | 1                   | 0                  | 1                        | 0.016(0.004)           | 8.5(0.2)  | 3  |
| <i>Emberiza calandra</i>              | 0                           | 0                            | 0                   | 0                  | 2                        | 0.030                  | 53.9      | 1  |
| <i>Emberiza citrinella</i>            | 1                           | 0                            | 0                   | 0                  | 2.05                     | 0.053(0.011)           | 28.5(0.5) | 15 |
| <i>Emberiza schoeniclus</i>           | 1                           | 1                            | 0                   | 0                  | 20                       | 0.032(0.010)           | 20.8(0.8) | 2  |
| <i>Erithacus rubecula</i>             | 0                           | 0                            | 1                   | 0                  | 100                      | 0.030(0.005)           | 17.0(0.5) | 16 |
| <i>Ficedula hypoleuca</i>             | 1                           | 1                            | 1                   | 0                  | 24                       | 0.014(0.006)           | 13.6(0.2) | 2  |
| <i>Fringilla coelebs</i>              | 1                           | 0                            | 0                   | 0                  | 2.5                      | 0.038(0.005)           | 29.9(0.6) | 28 |
| <i>Hirundo rustica</i>                | 1                           | 1                            | 0                   | 1                  | 100                      | 0.031(0.004)           | 17.8(0.5) | 22 |
| <i>Junco hyemalis</i>                 | 0                           | 1                            | 0                   | 0                  | 5                        | 0.030                  | 13.8      | 1  |

|                                |   |   |   |   |      |              |             |     |
|--------------------------------|---|---|---|---|------|--------------|-------------|-----|
| <i>Locustella luscinioides</i> | 0 | 1 | 0 | 0 | 1.5  | 0.006        | 13.8        | 1   |
| <i>Locustella naevia</i>       | 0 | 1 | 0 | 0 | 1.5  | 0.004        | 14.8        | 1   |
| <i>Luscinia luscinia</i>       | 0 | 1 | 0 | 0 | 200  | 0.070        | 25.5        | 1   |
| <i>Parus ater</i>              | 0 | 0 | 1 | 0 | 3    | 0.013        | 9.9         | 1   |
| <i>Parus caeruleus</i>         | 1 | 0 | 1 | 0 | 4.1  | 0.016(0.005) | 10.6(0.4)   | 6   |
| <i>Parus major</i>             | 1 | 0 | 1 | 0 | 4.5  | 0.029(0.004) | 16.9(0.3)   | 15  |
| <i>Parus montanus</i>          | 0 | 0 | 1 | 0 | 1    | 0.012        | 11.5        | 1   |
| <i>Phylloscopus collybita</i>  | 0 | 1 | 0 | 0 | 1    | 0.008(0.002) | 8.1(0.1)    | 7   |
| <i>Phylloscopus trochilus</i>  | 0 | 1 | 0 | 0 | 31   | 0.013        | 8.8         | 1   |
| <i>Prunella modularis</i>      | 0 | 1 | 0 | 0 | 4    | 0.021(0.004) | 20.3(0.4)   | 5   |
| <i>Regulus regulus</i>         | 1 | 0 | 0 | 0 | 1    | 0.011(0.003) | 5.6(0.2)    | 11  |
| <i>Sturnus vulgaris</i>        | 1 | 1 | 1 | 1 | 42.9 | 0.093(0.014) | 69.4(3.0)   | 14  |
| <i>Sylvia melanocephala</i>    | 1 | 0 | 0 | 0 | 83.7 | 0.020(0.010) | 10.3(0.5)   | 2   |
| <i>Taeniopygia guttata</i>     | 1 | 0 | 0 | 0 | 1    | 0.005        | 12.2        | 1   |
| <i>Troglodytes aedon</i>       | 0 | 0 | 0 | 0 | 100  | 0.040        | 12.1        | 1   |
| <i>Troglodytes troglodytes</i> | 0 | 0 | 0 | 0 | 6.5  | 0.019(0.003) | 10.4(0.4)   | 11  |
| <i>Turdus iliacus</i>          | 0 | 1 | 0 | 0 | 1    | 0.077(0.003) | 67.3(4.0)   | 8   |
| <i>Turdus merula</i>           | 1 | 0 | 0 | 0 | 32   | 0.220(0.011) | 98.6(1.0)   | 185 |
| <i>Turdus philomelos</i>       | 0 | 1 | 0 | 0 | 171  | 0.121(0.008) | 69.1(1.1)   | 31  |
| <i>Turdus torquatus</i>        | 1 | 1 | 0 | 0 | 3    | 0.130        | 110.0       | 1   |
| <i>Turdus viscivorus</i>       | 0 | 1 | 0 | 0 | 100  | 0.302(0.170) | 101.0(10.1) | 10  |
| <i>Upupa epops</i>             | 1 | 1 | 1 | 0 | 1    | 0.069(0.009) | 34.6(0.8)   | 2   |

---
